# Supplementary material for: Blinding reduces institutional prestige bias during initial review of applications for a young investigator award
Source: eLife. 2024 Mar 25;13:e92339. doi: 10.7554/eLife.92339 (PMC10963027; doi:10.7554/eLife.92339)
Supplement: Figure 1—source data 1. — All LOIs Received, Full Application Invitations, and Program Awards by institutional category from 2017 to 2020 (unblinded) and 2021–2024 (blinded). [file elife-92339-fig1-data1.xlsx]

## Sheet: FedS&E2018
National Science Foundation (NSF) National Center for Science and Engineering Statistics (NCSES) tables of Federal obligations for science and engineering funding to universities and colleges in 2018
	2017			2018			2019			2020				2021			2022			2023			2024
Institutional Category	LOIs Received	Full App Invites	Awards	LOIs Received	Full App Invites	Awards	LOIs Received	Full App Invites	Awards	LOIs Received	Full App Invites	Awards		LOIs Received	Full App Invites	Awards	LOIs Received	Full App Invites	Awards	LOIs Received	Full App Invites	Awards	LOIs Received	Full App Invites	Awards
FedS&E18 1-10	48	23	2	52	28	5	50	19	2	30	16	3		36	14	1	37	18	4	22	11	3	33	13	n/a
FedS&E18 11-25	69	29	4	60	17	1	76	23	4	62	26	3		50	22	3	49	26	1	41	20	1	62	34	n/a
FedS&E18 26-50	65	17	0	57	22	1	77	17	0	65	15	2		49	21	4	43	18	3	52	27	3	47	16	n/a
FedS&E18 51-100	60	16	1	75	14	2	90	26	3	56	19	1		58	20	1	41	17	0	34	13	1	56	21	n/a
Other	74	14	1	107	19	1	112	23	1	80	22	1		63	19	2	60	26	2	45	23	3	48	13	n/a
Total	316	99	8	351	100	10	405	108	10	293	98	10		256	96	11	230	105	10	194	94	11	246	97
National Science Foundation (NSF) National Center for Science and Engineering Statistics (NCSES) tables of Federal obligations for science and engineering funding to universities and colleges in 2020
	2017			2018			2019			2020				2021			2022			2023			2024
Institutional Category	LOIs Received	Full App Invites	Awards	LOIs Received	Full App Invites	Awards	LOIs Received	Full App Invites	Awards	LOIs Received	Full App Invites	Awards		LOIs Received	Full App Invites	Awards	LOIs Received	Full App Invites	Awards	LOIs Received	Full App Invites	Awards	LOIs Received	Full App Invites	Awards
FedS&E20 1-10	52	26	4	59	29	6	50	17	2	30	16	3		35	14	1	31	18	4	17	11	2	37	17	n/a
FedS&E20 11-25	62	23	2	51	16	0	79	26	4	63	26	3		48	22	4	51	26	1	48	21	2	61	31	n/a
FedS&E20 26-50	68	18	0	58	22	1	71	13	0	62	13	1		49	21	3	42	16	3	43	22	3	42	14	n/a
FedS&E20 51-100	56	17	1	70	13	2	90	27	3	52	20	2		56	20	1	47	19	0	38	17	1	51	21	n/a
Other	78	15	1	113	20	1	115	25	1	86	23	1		68	19	2	59	26	2	48	23	3	55	14	n/a
Total	316	99	8	351	100	10	405	108	10	293	98	10		256	96	11	230	105	10	194	94	11	246	97
Shanghai Academic Ranking of World Universities, 2018
	2017			2018			2019			2020				2021			2022			2023			2024
Institutional Category	LOIs Received	Full App Invites	Awards	LOIs Received	Full App Invites	Awards	LOIs Received	Full App Invites	Awards	LOIs Received	Full App Invites	Awards		LOIs Received	Full App Invites	Awards	LOIs Received	Full App Invites	Awards	LOIs Received	Full App Invites	Awards	LOIs Received	Full App Invites	Awards
SH18 1-10	45	21	4	41	21	2	53	21	5	37	20	4		29	18	2	30	15	2	33	22	1	35	14	n/a
SH18 11-25	69	30	1	59	28	3	77	28	3	51	23	3		43	18	3	38	23	4	32	16	3	61	29	n/a
SH18 26-50	87	25	1	87	21	2	113	24	0	80	23	2		87	32	4	88	33	2	62	29	4	72	31	n/a
SH18 51-100	64	13	1	81	21	2	77	21	2	65	16	0		53	18	2	33	13	0	30	10	1	50	16	n/a
Other	49	10	1	83	9	1	85	14	0	60	16	1		44	10	0	41	21	2	37	17	2	28	7	n/a
Total	314	99	8	351	100	10	405	108	10	293	98	10		256	96	11	230	105	10	194	94	11	246	97
Shanghai Academic Ranking of World Universities, 2023
	2017			2018			2019			2020				2021			2022			2023			2024
Institutional Category	LOIs Received	Full App Invites	Awards	LOIs Received	Full App Invites	Awards	LOIs Received	Full App Invites	Awards	LOIs Received	Full App Invites	Awards		LOIs Received	Full App Invites	Awards	LOIs Received	Full App Invites	Awards	LOIs Received	Full App Invites	Awards	LOIs Received	Full App Invites	Awards
SH23 1-10	55	24	3	43	23	2	55	23	4	41	23	5		33	17	2	31	16	2	36	24	1	41	18	n/a
SH23 11-25	60	27	2	62	28	3	76	27	4	52	20	2		43	20	3	42	24	4	31	17	3	54	25	n/a
SH23 26-50	72	22	0	61	13	0	98	21	0	63	21	1		74	29	3	67	28	1	51	23	3	59	26	n/a
SH23 51-100	71	15	1	103	26	4	87	21	1	70	17	1		62	20	3	46	13	1	35	13	2	56	18	n/a
Other	56	11	2	82	10	1	89	16	1	67	17	1		44	10	0	44	24	2	41	17	2	36	10	n/a
Total	314	99	8	351	100	10	405	108	10	293	98	10		256	96	11	230	105	10	194	94	11	246	97
Times Higher Education World University Rankings, 2018
	2017			2018			2019			2020				2021			2022			2023			2024
Institutional Category	LOIs Received	Full App Invites	Awards	LOIs Received	Full App Invites	Awards	LOIs Received	Full App Invites	Awards	LOIs Received	Full App Invites	Awards		LOIs Received	Full App Invites	Awards	LOIs Received	Full App Invites	Awards	LOIs Received	Full App Invites	Awards	LOIs Received	Full App Invites	Awards
THE18 1-10	55	23	2	42	19	2	61	26	6	36	18	3		29	15	2	29	16	1	33	20	3	43	20	n/a
THE18 11-25	58	26	4	67	32	3	72	26	0	57	22	4		47	22	2	50	26	5	36	22	2	49	24	n/a
THE18 26-50	80	25	0	67	12	1	84	17	3	65	23	2		72	25	3	62	24	1	47	19	2	69	26	n/a
THE18 51-100	57	12	0	66	20	2	75	16	0	63	18	0		56	20	3	42	14	1	33	15	2	47	19	n/a
Other	66	13	2	109	17	2	113	23	1	72	17	1		52	14	1	47	25	2	45	18	2	38	8	n/a
Total	316	99	8	351	100	10	405	108	10	293	98	10		256	96	11	230	105	10	194	94	11	246	97
Times Higher Education World University Rankings, 2023
	2017			2018			2019			2020				2021			2022			2023			2024
Institutional Category	LOIs Received	Full App Invites	Awards	LOIs Received	Full App Invites	Awards	LOIs Received	Full App Invites	Awards	LOIs Received	Full App Invites	Awards		LOIs Received	Full App Invites	Awards	LOIs Received	Full App Invites	Awards	LOIs Received	Full App Invites	Awards	LOIs Received	Full App Invites	Awards
THE23 1-10	56	24	2	43	20	2	57	24	5	35	19	4		31	16	2	30	16	1	34	22	2	42	20	n/a
THE23 11-25	61	27	4	67	30	3	76	28	1	56	22	3		41	18	2	47	25	4	35	20	3	45	21	n/a
THE23 26-50	75	23	0	64	15	1	89	15	2	73	23	2		76	28	3	65	24	2	56	21	2	70	30	n/a
THE23 51-100	57	10	1	69	16	1	78	22	2	49	14	0		52	18	3	41	16	1	23	9	2	50	16	n/a
Other	67	15	1	108	19	3	105	19	0	80	20	1		56	16	1	47	24	2	46	22	2	39	10	n/a
Total	316	99	8	351	100	10	405	108	10	293	98	10		256	96	11	230	105	10	194	94	11	246	97
The Leiden Ranking, 2018-2021
	2017			2018			2019			2020				2021			2022			2023			2024
Institutional Category	LOIs Received	Full App Invites	Awards	LOIs Received	Full App Invites	Awards	LOIs Received	Full App Invites	Awards	LOIs Received	Full App Invites	Awards		LOIs Received	Full App Invites	Awards	LOIs Received	Full App Invites	Awards	LOIs Received	Full App Invites	Awards	LOIs Received	Full App Invites	Awards
Lei 1-10	42	20	2	44	23	4	46	16	3	30	11	2		30	14	1	36	17	1	21	9	3	31	12	n/a
Lei 11-25	68	26	3	51	18	1	74	22	3	55	24	3		38	16	3	33	18	3	38	21	0	54	26	n/a
Lei 26-50	55	16	0	54	14	1	59	11	0	54	14	1		54	18	2	47	20	4	38	18	3	49	22	n/a
Lei 51-100	54	13	1	72	21	1	82	25	1	55	16	1		55	26	3	49	19	0	37	14	1	44	15	n/a
Other	95	24	2	130	24	3	144	34	3	99	33	3		79	22	2	65	31	2	60	32	4	68	22	n/a
Total	314	99	8	351	100	10	405	108	10	293	98	10		256	96	11	230	105	10	194	94	11	246	97
AMBF, 1990-2018
	2017			2018			2019			2020				2021			2022			2023			2024
Institutional Category	LOIs Received	Full App Invites	Awards	LOIs Received	Full App Invites	Awards	LOIs Received	Full App Invites	Awards	LOIs Received	Full App Invites	Awards		LOIs Received	Full App Invites	Awards	LOIs Received	Full App Invites	Awards	LOIs Received	Full App Invites	Awards	LOIs Received	Full App Invites	Awards
AMBF 1-10	64	33	5	48	27	3	51	20	3	40	21	2		37	18	2	34	19	3	31	20	2	45	23	n/a
AMBF 11-25	46	12	0	51	18	1	87	27	4	58	27	4		54	25	3	50	28	3	41	22	3	48	21	n/a
AMBF 26-50	64	24	2	66	19	2	69	21	1	46	17	3		42	11	1	46	16	0	31	16	1	42	17	n/a
AMBF 51-100	52	15	1	59	16	3	73	20	1	53	10	0		47	17	4	36	13	3	32	11	1	48	19	n/a
Other	88	15	0	127	20	1	125	20	1	96	23	1		76	25	1	64	29	1	59	25	4	63	17	n/a
Total	314	99	8	351	100	10	405	108	10	293	98	10		256	96	11	230	105	10	194	94	11	246	97
Consensus Institutional List
	2017			2018			2019			2020				2021			2022			2023			2024
Institutional Category	LOIs Received	Full App Invites	Awards	LOIs Received	Full App Invites	Awards	LOIs Received	Full App Invites	Awards	LOIs Received	Full App Invites	Awards		LOIs Received	Full App Invites	Awards	LOIs Received	Full App Invites	Awards	LOIs Received	Full App Invites	Awards	LOIs Received	Full App Invites	Awards
Cons 1-10	56	27	3	51	29	5	58	22	4	37	19	2		37	15	1	35	22	4	26	15	3	42	21	n/a
Cons 11-25	61	25	3	58	21	1	74	27	4	53	25	6		36	21	4	35	17	2	41	24	1	58	25	n/a
Cons 26-50	71	20	0	68	18	1	93	18	0	71	20	1		71	25	3	66	27	2	50	26	3	51	23	n/a
Cons 51-96	62	13	1	69	16	2	79	21	1	54	13	0		56	21	2	43	14	0	32	7	1	55	16	n/a
Other	66	14	1	105	16	1	101	20	1	78	21	1		56	14	1	51	25	2	45	22	3	40	12	n/a
Total	316	99	8	351	100	10	405	108	10	293	98	10		256	96	11	230	105	10	194	94	11	246	97
