# Supplementary material for: Blinding reduces institutional prestige bias during initial review of applications for a young investigator award
Source: eLife. 2024 Mar 25;13:e92339. doi: 10.7554/eLife.92339 (PMC10963027; doi:10.7554/eLife.92339)
Supplement: Figure 4—source data 1. — All LOIs Received, Full Application Invitations, and Program Awards by gender category for 2017–2020 (unblinded) and 2021–2024 (blinded). [file elife-92339-fig4-data1.xlsx]

## Sheet: Source Data 2
	2017			2018			2019			2020				2021			2022			2023			2024
Gender Category	LOI	Full App Invites	Awards	LOI	Full App Invites	Awards	LOI	Full App Invites	Awards	LOI	Full App Invites	Awards		LOI	Full App Invites	Awards	LOI	Full App Invites	Awards	LOI	Full App Invites	Awards	LOI	Full App Invites	Awards
Male	213	66	7	257	69	7	280	77	7	165	62	4		152	61	5	148	69	7	121	62	7	148	59	n/a
Female	103	33	1	94	31	3	125	31	3	128	36	6		104	35	6	82	36	3	74	32	4	98	38	n/a
Total	316	99	8	351	100	10	405	108	10	293	98	10		256	96	11	230	105	10	195	94	11	246	97
