# Supplementary material for: Blinding reduces institutional prestige bias during initial review of applications for a young investigator award
Source: eLife. 2024 Mar 25;13:e92339. doi: 10.7554/eLife.92339 (PMC10963027; doi:10.7554/eLife.92339)
Supplement: Supplementary file 1. — The average value and ranges for institutional categories, with Chi-squared association test and Cramer’s V statistic for unblinded LOI reviews (2017–2020) and blinded LOI reviews (2021–2023) through program awards. [file elife-92339-supp1.xlsx]

## Sheet: Supplemental Table 1
	Ranked List: NCSES 2018				Ranked List: NCSES 2020
	Category	Unblinded Average (Range)	Blinded* Average (Range)	Unblinded - Blinded	Category	Unblinded Average (Range)	Blinded* Average (Range)	Unblinded - Blinded
	1-10	2.4 (1.6-3.4)	1.9 (0.65-2.5)	0.5	1-10	2.8 (1.6-3.6)	1.9 (0.66-3.0)	0.9
	11-25	1.6 (0.60-2.3)	0.77 (0.47-1.4)	0.83	11-25	1.2 (0.0-2.1)	1.0 (0.45-1.9)	0.2
	26-50	0.38 (0.0-0.90)	1.5 (1.0-1.9)	-1.12	26-50	0.27 (0.0-0.69)	1.4 (0.85-1.6)	-1.13
	51-100	0.87 (0.52-1.4)	0.31 (0.0-0.95)	0.56	51-100	1.0 (0.70-1.3)	0.29 (0.0-0.42)	0.71
	Other	0.40 (0.33-0.53)	0.89 (0.74-1.2)	-0.5	Other	0.38 (0.31-0.51)	0.86 (0.65-0.78)	-0.48
	Analysis	Unblinded	Blinded	Unblinded - Blinded	Analysis	Unblinded	Blinded	Unblinded - Blinded
	Chi-squared	19.69	8.08	11.61	Chi-squared	27.08	7.37	19.71
	p (d.f. = 4)	0.000576	0.08885		p (d.f. = 4)	1.92e-05	0.117
	Cramer's V	0.12	0.11	0.01	Cramer's V	0.14	0.1	0.04
	Effect Size	Small	Small		Effect Size	Small	Small
	Ranked List: ShanghaiRanking 2018				Ranked List: ShanghaiRanking 2023
	Category	Unblinded Average (Range)	Blinded* Average (Range)	Unblinded - Blinded	Category	Unblinded Average (Range)	Blinded* Average (Range)	Unblinded - Blinded
	1-10	3.0 (1.7-3.8)	1.2 (0.53-1.5)	1.8	1-10	2.6 (1.6-3.6)	1.1 (0.59-1.5)	1.5
	11-25	1.4 (0.57-1.8)	1.9 (1.6-2.4)	-0.5	11-25	1.6 (1.1-2.1)	1.8 (1.6-2.2)	-0.2
	26-50	0.39 (0.0-0.81)	0.91 (0.52-1.1)	-0.52	26-50	0.12 (0.0-0.47)	0.77 (0.34-1.0)	-0.65
	51-100	0.63 (0.0-1.1)	0.49 (0.0-0.88)	0.14	51-100	0.70 (0.42-1.4)	0.88 (0.50-1.1)	-0.18
	Other	0.43 (0.0-0.80)	0.69 (0.0-1.1)	-0.26	Other	0.68 (0.43-1.4)	0.64 (0.0-1.1)	0.04
	Analysis	Unblinded	Blinded	Unblinded - Blinded	Analysis	Unblinded	Blinded	Unblinded - Blinded
	Chi-squared	29.42	6.28	23.14	Chi-squared	24.77	5.29	19.48
	p (d.f. = 4)	6.43e-06	0.179		p (d.f. = 4)	5.59e-05	0.259
	Cramer's V	0.15	0.1	0.05	Cramer's V	0.13	0.09	0.04
	Effect Size	Medium	Small		Effect Size	Small	Small
	Ranked List: Times Higher Ed 2018				Ranked List: Times Higher Ed 2023
	Category	Unblinded Average (Range)	Blinded* Average (Range)	Unblinded - Blinded	Category	Unblinded Average (Range)	Blinded* Average (Range)	Unblinded - Blinded
	1-10	2.4 (1.4-4.0)	1.3 (0.8-1.6)	1.1	1-10	2.5 (1.4-3.6)	1.1 (0.77-1.5)	1.4
	11-25	1.6 (0.0-2.7)	1.4 (0.98-2.3)	0.2	11-25	1.6 (0.5-2.6)	1.5 (1.1-2.0)	0.1
	26-50	0.37 (0.0-1.5)	0.70 (0.37-0.97)	-0.33	26-50	0.34 (0.0-0.91)	0.75 (0.63-0.92)	-0.41
	51-100	0.27 (0.0-1.1)	0.95 (0.55-1.3)	-0.68	51-100	0.56 (0.0-1.0)	1.1 (0.56-1.5)	-0.54
	Other	0.65 (0.36-1.2)	0.74 (0.45-0.98)	-0.09	Other	0.48 (0.0-0.98)	0.72 (0.42-0.99)	-0.24
	Analysis	Unblinded	Blinded	Unblinded - Blinded	Analysis	Unblinded	Blinded	Unblinded - Blinded
	Chi-squared	19.46	3.26	16.2	Chi-squared	18.77	3.18	15.59
	p (d.f. = 4)	0.000639	0.516		p (d.f. = 4)	0.000871	0.528
	Cramer's V	0.12	0.07	0.05	Cramer's V	0.12	0.07	0.05
	Effect Size	Small	Small		Effect Size	Small	Small
	Ranked List: Leiden 2018-2021				Ranked List: AMBF 1990-2018
	Category	Unblinded Average (Range)	Blinded* Average (Range)	Unblinded - Blinded	Category	Unblinded Average (Range)	Blinded* Average (Range)	Unblinded - Blinded
	1-10	2.4 (1.9-3.2)	1.3 (0.64-2.5)	1.1	1-10	2.3 (1.5-3.0)	1.5 (1.3-2.0)	0.8
	11-25	1.4 (0.69-1.7)	1.3 (0-2.1)	0.1	11-25	1.1 (0.0-2.0)	1.3 (1.3-1.4)	-0.2
	26-50	0.30 (0.0-0.65)	1.4 (0.86-2.0)	-1.1	26-50	0.76 (0.6-1.9)	0.37 (0.0-0.57)	0.39
	51-100	0.56 (0.49-0.73)	0.58 (0.0-1.3)	-0.02	51-100	0.77 (0.0-1.8)	1.5 (0.55-2.0)	-0.73
	Other	0.84 (0.81-.089)	0.82 (0.59-1.2)	0.02	Other	0.22 (0.0-0.32)	0.62 (0.31-1.2)	-0.4
	Analysis	Unblinded	Blinded	Unblinded - Blinded	Analysis	Unblinded	Blinded	Unblinded - Blinded
	Chi-squared	15.8	2.71	13.09	Chi-squared	18.27	6.78	11.49
	p (d.f. = 4)	0.00331	0.607		p (d.f. = 4)	0.00109	0.148
	Cramer's V	0.11	0.06	0.05	Cramer's V	0.12	0.1	0.02
	Effect Size	Small	Small		Effect Size	Small	Small
	*Blinded scenario has three years of data, 2021-2023.
