# Supplementary material for: Blinding reduces institutional prestige bias during initial review of applications for a young investigator award
Source: eLife. 2024 Mar 25;13:e92339. doi: 10.7554/eLife.92339 (PMC10963027; doi:10.7554/eLife.92339)
Supplement: Supplementary file 2. — The top 100 Institutions in the eight ranked lists used in the study, plus the consensus ranking list. [file elife-92339-supp2.xlsx]

## Sheet: Supplemental Table 2
Survey Rank	NCSES - 2018	NCSES - 2020	Shanghai - 2018	Shanghai - 2023	Times Higher Ed - 2018	Times Higher Ed - 2023	Leiden - 2018-2021	AMBF - 1990-2018		Consensus
1	Johns Hopkins University	Johns Hopkins University	Harvard University	Harvard University	Harvard University	Harvard University	Harvard University	Massachusetts Institute of Technology		Stanford University
2	University of Michigan	University of Michigan	Stanford University	Stanford University	California Institute of Technology	California Institute of Technology	Johns Hopkins University	University of California, Berkeley		Johns Hopkins University
3	University of Washington	University of Washington	Massachusetts Institute of Technology	Massachusetts Institute of Technology	Stanford University	Stanford University	University of Pennsylvania	Cornell University		Harvard University
4	University of California, San Diego	University of California, Los Angeles	University of California, Berkeley	University of California, Berkeley	Princeton University	Princeton University	University of Michigan	Johns Hopkins University		University of California, Los Angeles
5	University of California, San Francisco	Columbia University	Princeton University	Princeton University	Massachusetts Institute of Technology	University of California, Berkeley	Stanford University	Stanford University		Columbia University
6	Columbia University	Georgia Institute of Technology	Columbia University	Columbia University	University of Chicago	Massachusetts Institute of Technology	University of California, San Francisco	University of California, Los Angeles		University of Pennsylvania
7	Stanford University	University of California, San Francisco	California Institute of Technology	California Institute of Technology	University of Pennsylvania	Yale University	Case Western Reserve University	University of Washington		University of Washington
8	University of Pittsburgh	University of California, San Diego	University of Chicago	University of Chicago	University of California, Los Angeles	Johns Hopkins University	University of Texas Health Science Center, Houston	University of California, San Diego		Yale University
9	University of Pennsylvania	Duke University	University of California, Los Angeles	Yale University	Johns Hopkins University	University of California, Los Angeles	University of Pittsburgh	Yale University		University of California, San Diego
10	Duke University	Stanford University	Cornell University	Cornell University	Yale University	University of Chicago	University of Washington	Harvard University		University of California, San Francisco
11	University of Colorado, Boulder	University of Pittsburgh	Yale University	University of California, Los Angeles	Northwestern University	University of Pennsylvania	Duke University	University of Pennsylvania		University of Michigan
12	University of California, Los Angeles	University of Pennsylvania	University of Washington	University of Pennsylvania	Cornell University	Columbia University	Yale University	University of Utah		Cornell University
13	Washington University, St. Louis	University of Colorado, Boulder	University of California, San Diego	Johns Hopkins University	University of Michigan	Cornell University	University of California, Los Angeles	University of North Carolina, Chapel Hill		Duke University
14	University of North Carolina, Chapel Hill	Yale University	University of Pennsylvania	University of Washington	University of California, Berkeley	University of Michigan	Columbia University	Columbia University		Northwestern University
15	Georgia Institute of Technology	University of North Carolina, Chapel Hill	Johns Hopkins University	University of California, San Diego	Carnegie Mellon University	New York University	University of California, San Diego	Pennsylvania State University		Massachusetts Institute of Technology
16	Harvard University	Washington University, St. Louis	Washington University, St. Louis	University of California, San Francisco	Columbia University	University of Washington	University of North Carolina, Chapel Hill	University of Texas, Austin		University of North Carolina, Chapel Hill
17	Yale University	Vanderbilt University	University of California, San Francisco	Washington University, St. Louis	Duke University	Carnegie Mellon University	Ohio State University	University of Illinois, Urbana-Champaign		Washington University, St. Louis
18	Pennsylvania State University	Emory University	Northwestern University	University of Michigan	University of Washington	Northwestern University	Cornell University	University of Wisconsin, Madison		University of Chicago
19	University of Wisconsin, Madison	Northwestern University	Duke University	New York University	University of California, San Diego	University of Illinois, Urbana-Champaign	Emory University	University of California, Irvine		University of Wisconsin, Madison
20	Northwestern University	Pennsylvania State University	University of Michigan	Northwestern University	Georgia Institute of Technology	University of California, San Diego	Washington University, St. Louis	Northwestern University		California Institute of Technology
21	Vanderbilt University	University of Wisconsin, Madison	University of Wisconsin, Madison	University of North Carolina, Chapel Hill	University of Illinois, Urbana-Champaign	Duke University	Northwestern University	Washington University, St. Louis		University of California, Berkeley
22	University of Southern California	University of Minnesota	Rockefeller University	Duke University	New York University	Georgia Institute of Technology	University of Minnesota	University of Chicago		Georgia Institute of Technology
23	University of Minnesota	Cornell University	University of North Carolina, Chapel Hill	University of Wisconsin, Madison	University of Wisconsin, Madison	University of Texas, Austin	University of Colorado, Denver	University of Colorado, Boulder		Princeton University
24	Cornell University	Harvard University	New York University	Rockefeller University	Purdue University	University of California, Davis	New York University	California Institute of Technology		New York University
25	Emory University	New York University	University of Minnesota	University of Texas, Austin	University of Texas, Austin	Purdue University	Vanderbilt University	Duke University		University of Minnesota
26	New York University	University of Southern California	University of Colorado, Boulder	University of Minnesota	University of Minnesota	University of Wisconsin, Madison	Icahn School of Medicine at Mount Sinai	Princeton University		University of Colorado, Boulder
27	University of Texas, Austin	Icahn School of Medicine at Mount Sinai	University of Texas, Austin	University of Texas Southwestern Medical Center	Pennsylvania State University	University of California, Santa Barbara	University of Florida	University of California, Santa Barbara		University of Texas, Austin
28	Massachusetts Institute of Technology	University of Texas, Austin	University of Illinois, Urbana-Champaign	University of Maryland, College Park	University of California, Davis	University of North Carolina, Chapel Hill	University of Wisconsin, Madison	Georgia Institute of Technology		Pennsylvania State University
29	Association of Universities for Research in Astronomy	University of California, Davis	University of California, Santa Barbara	University of Illinois, Urbana-Champaign	University of Maryland, College Park	University of Florida	University of Southern California	North Carolina State University		University of Pittsburgh
30	University of California, Davis	Baylor College of Medicine	University of Texas Southwestern Medical Center	University of Colorado, Boulder	University of North Carolina, Chapel Hill	University of Southern California	University of Alabama, Birmingham	University of California, San Francisco		University of Southern California
31	Icahn School of Medicine at Mount Sinai	University of Alabama, Birmingham	Vanderbilt University	University of Southern California	University of California, Santa Barbara	Brown University	University of Cincinnati	University of Arizona		University of California, Davis
32	University of Alabama, Birmingham	Ohio State University	University of Maryland, College Park	University of California, Santa Barbara	Washington University, St. Louis	University of Maryland, College Park	Baylor College of Medicine	William Marsh Rice University		Icahn School of Medicine at Mount Sinai
33	Case Western Reserve University	University of Utah	University of Southern California	University of California, Irvine	University of Southern California	University of Minnesota	University of Texas Southwestern Medical Center	Michigan State University		University of Illinois, Urbana-Champaign
34	Michigan State University	University of Chicago	Boston University	Vanderbilt University	Brown University	Washington University, St. Louis	University of Utah	Rockefeller University		Carnegie Mellon University
35	Baylor College of Medicine	Case Western Reserve University	Purdue University	University of Texas M. D. Anderson Cancer Center	Texas A & M University	Boston University	University of California, Davis	University of California, Davis		Vanderbilt University
36	University of Florida	University of Florida	William Marsh Rice University	University of Pittsburgh	Ohio State University	Michigan State University	University of Miami, Florida	Colorado State University		Ohio State University
37	Ohio State University	Michigan State University	Pennsylvania State University	Purdue University	Michigan State University	Texas A & M University	Boston University	University of Michigan		University of Florida
38	University of Rochester	Oregon Health and Science University	Georgia Institute of Technology	Brown University	University of Florida	Pennsylvania State University	Rutgers, University of New Jersey	University of Southern California		Emory University
39	University of Utah	Massachusetts Institute of Technology	Mayo Clinic	Arizona State University (39)	University of Pittsburgh	University of California, Irvine	Indiana University-Purdue University Indianapolis	Indiana University, Bloomington		University of California, Irvine
40	Carnegie Mellon University	University of Massachusetts	University of California, Irvine	Boston University (39)	Arizona State University	Ohio State University	Pennsylvania State University	University of Minnesota		Boston University
41	Oregon Health and Science University	University of Rochester	University of Florida	Carnegie Mellon University (39)	Indiana University, Bloomington	Arizona State University	University of Chicago	University of Maryland, College Park		University of Texas Southwestern Medical Center
42	University of Chicago	Rutgers, University of New Jersey	University of Pittsburgh	Emory University (39)	Boston University	Vanderbilt University	University of Iowa	Scripps Research Institute		Michigan State University
43	Rutgers, University of New Jersey	Texas A&M University, System Office	Carnegie Mellon University	Mayo Clinic (39)	University of Colorado, Boulder	University of Arizona	University of Illinois, Chicago	Ohio State University		University of Utah
44	University of California, Berkeley	University of Arizona	Ohio State University	Icahn School of Medicine at Mount Sinai (39)	Rutgers, University of New Jersey	University of Colorado, Boulder	University of Maryland, Baltimore County	Iowa State University		William Marsh Rice University
45	University of Illinois, Urbana-Champaign	University of Illinois, Urbana-Champaign	University of California, Davis	William Marsh Rice University (39)	University of California, Irvine	Emory University	Oregon Health and Science University	Montana State University		University of Maryland, College Park
46	Boston University	Carnegie Mellon University	University of Texas M. D. Anderson Cancer Center	Rutgers, University of New Jersey (39)	Florida State University	Rutgers, University of New Jersey	University of Virginia	University of Florida		Case Western Reserve University
47	University of Maryland, College Park	Boston University	Arizona State University (47)	Ohio State University (39)	Dartmouth College	University of Pittsburgh	Brown University	Carnegie Mellon University		University of California, Santa Barbara
48	University of Arizona	Association of Universities for Research in Astronomy	Baylor College of Medicine (47)	Pennsylvania State University (39)	William Marsh Rice University	University of Hawaii, Manoa	University of California, Irvine	University of Pittsburgh		University of Arizona
49	Scripps Research Institute	University of Maryland, College Park	Brown University (47)	University of California, Davis (39)	Vanderbilt University	Case Western Reserve University	University of Arizona	University of Rochester		Rutgers, University of New Jersey
50	Texas A & M University	University of Iowa	Case Western Reserve University (47)	University of Florida (39)	University of Virginia	University of Notre Dame	Virginia Commonwealth University	Cold Spring Harbor		Baylor College of Medicine
51	University of California, Irvine	University of California, Berkeley	Emory University (47)	University of Utah (39)	Emory University	University of Rochester	University of Rochester	Boston University		Oregon Health and Science University
52	University of Iowa	Texas A & M University	Icahn School of Medicine at Mount Sinai (47)	Baylor College of Medicine (52)	Virginia Polytechnic Institute	Dartmouth College	University of Kentucky	Memorial Sloan-Kettering Institute		Purdue University
53	California Institute of Technology	University of California, Irvine	Indiana University, Bloomington (47)	Case Western Reserve University (52)	University of Arizona	University of Virginia	Medical University of South Carolina	University of Massachusetts, Amherst		Texas A & M University
54	Indiana University-Purdue University Indianapolis	University of Maryland, Baltimore County	Michigan State University (47)	Georgia Institute of Technology (52)	University of Notre Dame	William Marsh Rice University	University of Tennessee, Knoxville	New York University		University of Rochester
55	University of Virginia	Indiana University-Purdue University Indianapolis	Rutgers, University of New Jersey (47)	Indiana University, Bloomington (52)	University of Delaware	Indiana University, Bloomington	Wayne State University	University of New Mexico		Brown University
56	University of Maryland, Baltimore County	University of Kentucky	University of Arizona (47)	Michigan State University (52)	Georgetown University	University of Delaware	Michigan State University	Emory University		University of Alabama, Birmingham
57	Oregon State University	University of Virginia	University of California, Santa Cruz (47)	Texas A & M University (52)	University of Hawaii, Manoa	North Carolina State University	University of Connecticut	Texas A & M University		Indiana University, Bloomington
58	University of Kentucky	University of Texas Southwestern Medical Center	University of Utah (47)	Tufts University (52)	University of South Florida	Florida State University	SUNY Buffalo	College of William and Mary		Arizona State University
59	University of Texas Southwestern Medical Center	University of Illinois, Chicago	North Carolina State University (59)	University of Arizona (52)	Louisiana State University	Iowa State University	Medical College of Wisconsin	Pomona College		University of Virginia
60	University of Miami, Florida	Scripps Research Institute	Oregon Health and Science University (59)	University of California, Santa Cruz (52)	University of California, Santa Cruz	University of South Florida	Thomas Jefferson University	San Francisco State University		University of Maryland, Baltimore County
61	Purdue University	Purdue University	Oregon State University (59)	University of Massachusetts, Amherst (52)	Case Western Reserve University	Tufts University	University of Texas, Austin	Boston College		North Carolina State University
62	North Carolina State University	University of Miami, Florida	Texas A & M University (59)	Florida State University (62)	North Carolina State University	Virginia Polytechnic Institute	Texas A & M University	Hope College		University of Iowa
63	Albert Einstein College of Medicine	Albert Einstein College of Medicine	Tufts University (59)	George Mason University (62)	University of Rochester	Georgetown University	Wake Forest University	University of Miami, Florida		Indiana University-Purdue University Indianapolis
64	Princeton University	University of Oklahoma	University of California, Riverside (59)	North Carolina State University (62)	University of Houston	University of Utah	University of South Florida	Lehigh University		Oregon State University
65	Arizona State University	University of Texas M. D. Anderson Cancer Center	University of Iowa (59)	Northeastern University (62)	University of Utah	SUNY Buffalo	University of Kansas	Vanderbilt University		University of Massachusetts
66	University of Illinois, Chicago	California Institute of Technology	University of Massachusetts, Amherst (59)	Oregon Health and Science University (62)	University of Iowa	University of Massachusetts	Rush University	Tufts University		University of California, Riverside
67	University of Massachusetts	Oregon State University	University of Massachusetts (59)	Oregon State University (62)	Tufts University	University of Miami, Florida	Massachusetts Institute of Technology	University of California, Riverside		University of Illinois, Chicago
68	Woods Hole Oceanographic Institution	Brown University	University of Rochester (59)	George Washington University (62)	University of Alabama, Birmingham	University of California, Santa Cruz	University of California, Berkeley	Salk Institute for Biological Studies		University of Miami, Florida
69	University of Texas M. D. Anderson Cancer Center	Arizona State University	University of Virginia (59)	University of Massachusetts (62)	University of Georgia	George Washington University	Tufts University	Furman University		Florida State University
70	Virginia Polytechnic Institute	University of Connecticut	Brandeis University (70)	University of Texas Health Science Center, Houston (62)	University of Massachusetts	University of California, Riverside	George Washington University	Case Western Reserve University		University of Texas Health Science Center, Houston
71	Brown University	Virginia Polytechnic Institute	Colorado State University (70)	University of California, Riverside (62)	Rensselaer Polytechnic Institute	Washington State University	University of Illinois, Urbana-Champaign	Haverford College		University of Delaware
72	Medical University of South Carolina	Woods Hole Oceanographic Institution	Dartmouth College (70)	University of Cincinnati (62)	University of Illinois, Chicago	University of Illinois, Chicago	University of Nebraska Medical Center	University of Houston		Virginia Polytechnic Institute
73	Florida State University	Princeton University	Florida State University (70)	University of Colorado, Denver (62)	Iowa State University	University of Texas, El Paso	University of Missouri, Columbia	University of Delaware		University of South Florida
74	University of Georgia	Medical University of South Carolina	George Mason University (70)	University of Delaware (62)	University of California, Riverside	University of Iowa	University of Georgia	George Washington University		Tufts University
75	George Washington University	North Carolina State University	Georgetown University (70)	University of Iowa (62)	Colorado State University	Boston College	Purdue University	University of Cincinnati		University of Hawaii, Manoa
76	Wake Forest University	University of Georgia	Iowa State University (70)	University of Missouri, Columbia (62)	George Washington University	University of Nebraska, Lincoln	Temple University	Louisiana State University		University of Kentucky
77	University of Kansas	Wake Forest University	Northeastern University (70)	University of Nebraska, Lincoln (62)	University of Cincinnati	Colorado School of Mines	University of Louisville	Miami University		Colorado State University
78	Colorado State University	Utah State University	George Washington University (70)	University of Rochester (62)	University of Oregon	Northeastern University	University of Oklahoma	Washington State University		Dartmouth College
79	University of Oklahoma	University of Kansas	University of Georgia (70)	University of Tennessee, Knoxville (62)	University of Denver	Colorado State University	Albert Einstein College of Medicine	Purdue University		Virginia Commonwealth University
80	University of Connecticut	University of Texas Health Science Center, Houston	University of Alabama, Birmingham (70)	University of Virginia (62)	University of Nebraska, Lincoln	University of Central Florida	University of Massachusetts	California State University, Long Beach		George Washington University
81	University of New Mexico	Louisiana State University	University of Colorado, Denver (70)	Virginia Commonwealth University (62)	University of Texas, Dallas	University of Conneticut	SUNY Stony Brook	Albert Einstein College of Medicine		University of Houston
82	Dartmouth College	University of New Mexico	University of Delaware (70)	Virginia Polytechnic Institute (62)	Oregon State University	University of New Mexico	University of South Carolina	Fred Hutchinson Cancer Research Center		University of Cincinnati
83	University of Delaware	University of Delaware	University of Hawaii, Manoa (70)	Brandeis University (83)	Syracuse University	University of Tennessee, Knoxville	University of Texas Health Science Center, San Antonio	University of Massachusetts		Georgetown University
84	University of California, Santa Barbara	Medical College of Wisconsin	University of Houston (70)	Colorado State University (83)	SUNY Buffalo	University of Houston	Tulane University	Northern Arizona University		Iowa State University
85	Washington State University	SUNY Stony Brook	University of Illinois, Chicago (70)	Dartmouth College (83)	University of Conneticut	Syracuse University	Dartmouth College	Wellesley College		Albert Einstein College of Medicine
86	SUNY Stony Brook	University of South Florida	University of Kansas (70)	Indiana University-Purdue University Indianapolis (83)	University of South Carolina	University of Arkansas	North Carolina State University	Brandeis University		SUNY Buffalo
87	Medical College of Wisconsin	Colorado State University	University of Maryland, Baltimore County (70)	SUNY Buffalo (83)	Washington State University	Florida International University	University of Arkansas	University of Virginia		University of Georgia
88	Temple University	University of Alaska, Fairbanks	University of Miami, Florida (70)	SUNY Stony Brook (83)	Colorado School of Mines	University of Kentucky	University of Texas Medical Branch, Galveston	Trinity University		Northeastern University
89	Northeastern University	University of California, Santa Barbara	University of Missouri, Columbia (70)	University of Georgia (83)	Northeastern University	University of Texas, Dallas	University of Mississippi	Rutgers, University of New Jersey		University of Connecticut
90	Virginia Commonwealth University	Dartmouth College	University of Nebraska, Lincoln (70)	University of Central Florida (83)	George Mason University	Georgia State University	Arizona State University	Brown University		University of Kansas
91	Tufts University	Washington State University	University of Notre Dame (70)	University of Connecticut (83)	Georgia State University	George Mason University	Texas Tech University	University of Richmond		University of New Mexico
92	Louisiana State University	George Washington University	University of South Florida (70)	University of Hawaii, Manoa (83)	University of Miami, Florida	SUNY Stony Brook	University of New Mexico	Carnegie Institution of Washington		University of Missouri, Columbia
93	Iowa State University	Virginia Commonwealth University	University of Tennessee, Knoxville (70)	University of Houston (83)	Brandeis University	Missouri University of Science and Technology	Georgetown University	Bowdoin College		Louisiana State University
94	University of Texas Health Science Center, Houston	University of Hawaii, Manoa	Virginia Commonwealth University (70)	University of Illinois, Chicago (83)	Missouri University of Science and Technology	Rensselaer Polytechnic Institute	Augusta University	University of Missouri, Columbia		Washington State University
95	University of Missouri, Columbia	University of Cincinnati	Virginia Polytechnic Institute (70)	University of Kansas (83)	SUNY Stony Brook	Drexel University	University of Maryland, College Park	University of Oregon		SUNY Stony Brook
96	Utah State University	University of Texas Medical Branch	Boston College (96)	University of Kentucky (83)	Clark University	University of Georgia	West Virginia University	Smith College		Temple University
97	University of Texas Medical Branch	Tufts University	Drexel University (96)	University of Maryland, Baltimore County (83)	American University	SUNY Albany	Virginia Polytechnic Institute	Baylor College of Medicine
98	University of Cincinnati	Florida State University	Indiana University-Purdue University Indianapolis (96)	University of Miami, Florida (83)	San Diego State University	University of Dayton	Drexel University	California State University, Los Angeles
99	University of Massachusetts, Amherst	Temple University	Louisiana State University (96)	University of South Florida (83)	University of Alaska, Fairbanks	University of Missouri	Indiana University, Bloomington	University of San Diego
100	University of Texas, San Antonio	Iowa State University	Medical University of South Carolina (96)	Albert Einstein College of Medicine (100)	University of Kansas	University of Alaska, Fairbanks	Uniformed Services University of the Health Sciences	University of Iowa
			SUNY Buffalo (96)	CUNY Graduate School (100)
			SUNY Stony Brook (96)	Drexel University (100)
			Temple University (96)	Georgetown University (100)
			University of Central Florida (96)	Iowa State University (100)
			University of Cincinnati (96)	Louisiana State University (100)
			University of Connecticut (96)	Northern Arizona University (100)
			University of Kentucky (96)	Rensselaer Polytechnic Institute (100)
			University of New Mexico (96)	Temple University (100)
			University of North Texas (96)	University of Alabama, Birmingham (100)
			University of Oregon (96)	University of Notre Dame (100)
			University of South Carolina (96)	University of Oregon (100)
			University of Texas Health Science Center, Houston (96)	University of South Carolina (100)
			University of Texas Health Science Center, San Antonio (96)	University of Texas Health Science Center, San Antonio (100)
			University of Texas, Dallas (96)	University of Texas Medical Branch (100)
			University of Vermont (96)	University of Vermont (100)
			Washington State University (96)	Utah State University (100)
			Yeshiva University (96)	Washington State University (100)
