# Supplementary material for: Blinding reduces institutional prestige bias during initial review of applications for a young investigator award
Source: eLife. 2024 Mar 25;13:e92339. doi: 10.7554/eLife.92339 (PMC10963027; doi:10.7554/eLife.92339)
Supplement: Supplementary file 3. — All LOIs received, Full Application invitations, and Program Awards from 2017 to 2020 (unblinded) and 2021–2024 (blinded), sorted alphabetically by institution name. [file elife-92339-supp3.xlsx]

## Sheet: Supplemental Table 3
Year	2017			2018			2019			2020				2021			2022			2023			2024
Institution	LOIs Received	Full App Invites	Awards	LOIs Received	Full App Invites	Awards	LOIs Received	Full App Invites	Awards	LOIs Received	Full App Invites	Awards		LOIs Received	Full App Invites	Awards	LOIs Received	Full App Invites	Awards	LOIs Received	Full App Invites	Awards	LOIs Received	Full App Invites	Awards
Albany Medical College										1	1	0		1	0	0
Albert Einstein College of Medicine							1	0	0					1	0	0	1	0	0
Arizona State University	5	3	0	1	0	0	5	1	0	2	0	0		4	3	0	5	1	0	4	0	0	8	1
Asbury University							1	0	0
Auburn University				2	1	0	1	0	0	2	0	0					1	0	0
Barnard College														1	0	0
Bates College				1	0	0
Baylor College of Medicine	1	0	0	2	0	0	1	0	0								1	1	1	1	0	0	2	0
Baylor University				1	0	0				1	0	0
Boise State University							1	0	0														2	1
Boston College				1	0	0	2	1	1	1	0	0					1	0	0
Boston University	5	1	0	2	0	0	2	0	0	2	0	0		3	1	0	1	1	1	2	2	1	3	2
Brandeis University	1	1	0	1	0	0				2	1	0		2	1	0				2	1	0	1	1
Brigham Young University				1	0	0
Brooklyn College							2	0	0
Brown University				1	0	0				1	1	0		2	0	0				1	0	0
California Institute of Technology				2	1	0	7	3	1	2	2	1								1	1	0	1	0
California State University, Long Beach																	1	0	0
California State University, Los Angeles																				1	0	0
California State University, Northridge														1	0	0	1	1	0
Carleton College				1	0	0
Carnegie Mellon University	2	1	0	1	0	0	4	1	0	2	0	0											1	0
Case Western Reserve University	2	0	0				1	0	0	4	0	0		2	0	0				1	0	0	2	0
Catholic University of America				1	0	0
Cedars-Sinai Medical Center										1	0	0					1	0	0	1	0	0	1	1
Chapman University				1	0	0	2	0	0	1	0	0
Children's Hospital Los Angeles				1	0	0
Cincinnati Children's Hospital Medical Center										1	0	0					1	1	0
City of Hope				1	0	0	1	0	0	2	1	0					1	0	0
Clarkson University	1	0	0																	1	1	0
Clemson University	1	0	0	1	0	0	4	0	0	2	0	0		4	2	0	1	1	0	3	1	1	1	0
Cleveland Clinic							1	0	0	1	1	0					1	1	0	3	1	0	1	0
Cold Spring Harbor	1	0	0
Colorado School of Mines	1	0	0	1	0	0	1	1	0	1	1	0		2	1	0	4	3	1				1	0
Colorado State University				1	0	0	3	1	0
Colorado State University, Pueblo				1	0	0
Columbia University	5	1	0	6	4	1	7	2	0	6	4	1		6	2	0	4	3	1	3	2	0	2	0
Connecticut Agricultural Experiment Station	1	1	0
Cornell University	4	3	2	2	1	0	2	1	0	5	2	0		1	1	0	2	0	0	3	3	0	1	0
Creighton University										1	0	0
CUNY Advanced Science Research Center							2	2	0											1	1	0	1	0
CUNY Baruch College																				1	1	1
CUNY Queens College																				1	0	0
Dana Farber Cancer Institute	4	1	0	2	0	0
Dartmouth College	3	1	0	1	1	0	2	2	1	1	0	0		1	0	0	1	1	0
Drexel University				1	0	0	0	0	0
Duke University	2	0	0	1	0	0				1	0	0		1	0	0
Duquesne University							1	0	0
East Carolina University	1	0	0				1	0	0					1	0	0				1	1	0
East Tennessee State University							1	0	0
Elmhurst College							1	0	0
Emory University	3	2	0	1	0	0	9	2	0	6	2	0		5	3	1	2	1	0	4	2	0	2	2
Fairleigh Dickinson University														1	0	0
Florida A & M University														1	1	0	1	1	0
Florida Institute of Technology				1	0	0
Florida International University																				1	0	0
Florida State University	1	0	0	2	0	0				3	0	0		3	1	0	1	0	0
Fred Hutchinson Cancer Research Center	1	0	0	1	1	0	3	1	0	1	1	0
George Mason University																	1	0	0				1	0
George Washington University							1	1	0	1	1	0
Georgetown University	2	0	0				1	1	0								1	0	0
Georgia Institute of Technology	4	2	1	10	2	1	3	1	0	3	2	1		2	0	0	3	2	0	2	1	0	4	3
Gladstone Institutes														1	0	0
H. Lee Moffitt Cancer Center & Research Institute							1	1	0
Harvard University	4	2	0	6	4	0	6	1	1	8	3	0		2	2	0	7	5	0	4	1	0	3	1
Hauptman-Woodward Medical Research Institute										1	0	0
Houston Methodist Research Institute							1	0	0
HudsonAlpha Institute for Biotechnology	1	0	0
Icahn School of Medicine at Mount Sinai	1	0	0				3	0	0	1	0	0		1	1	0							1	0
Illinois State University				1	0	0
Indiana University, Bloomington				1	0	0	1	1	0					3	1	0	3	0	0				2	0
Indiana University-Purdue University Indianapolis				1	0	0								1	0	0
Iowa State University	3	0	0				1	0	0	2	2	0		1	0	0				1	1	0
J Craig Venter Institute				1	0	0	1	0	0	1	0	0
James Madison University	1	0	0	1	0	0
Johns Hopkins University	6	2	0	4	2	1	5	2	0	4	2	0		4	1	0	3	2	0	3	2	1	1	0
Joslin Diabetes Center	1	0	0
Kansas State University										1	0	0											1	0
Keystone College										1	0	0
La Jolla Institute for Immunology																							1	1
Lehigh University				2	2	1	3	1	0					1	0	0							1	0
Lincoln University							1	0	0
Louisiana State University				2	1	1	1	0	0	2	1	0					1	0	0				1	1
Loyola Marymount University							1	1	0
Loyola University Chicago	1	0	0	3	0	0														2	0	0
Marquette University														1	1	0	1	1	0
Masonic Medical Research Institute										1	0	0
Massachusetts General Hospital	1	1	0	1	0	0	1	0	0	1	1	0
Massachusetts Institute of Technology	8	3	0	5	3	0	8	3	0	5	3	0		5	5	2	2	2	0	4	2	0	5	2
Max Planck Florida Institute for Neuroscience																	2	1	0				1	0
Mayo Clinic				1	0	0																	2	0
MDI Biological Laboratory	1	0	0				1	0	0
Medical University of South Carolina				1	0	0																	1	1
Memorial Sloan-Kettering Institute	1	1	0	1	0	0
Miami University										1	0	0
Michigan State University	1	0	0	3	2	1	4	0	0	2	0	0					1	0	0	1	0	0	2	0
Michigan Technological University	1	0	0	1	0	0
Mind Research Network				1	0	0
Mississippi State University							1	0	0	1	1	0		2	0	0
Missouri University of Science & Technology	1	1	0	1	0	0								1	0	0
Mitchell Cancer Institute							1	0	0
Moffitt Cancer Center	1	0	0	2	1	0
Monell Chemical Senses Center	1	0	0				1	0	0					1	0	0
Montana State University	2	1	1	1	0	0																	1	0
Montclair State University				1	0	0
Morgan State University																							1	0
Morningside College				1	0	0
Mount Sinai School for Medicine	1	0	0
New Jersey Institute of Technology	3	0	0	2	0	0	2	0	0	1	0	0		1	0	0	1	0	0
New Mexico Institute of Mining and Technology																	1	1	0
New York Genome Center				1	0	0
New York University	4	1	0	2	2	0	4	1	0	4	0	0		1	1	1				4	2	0	7	4
North Carolina State University				4	1	0	5	2	0	2	1	0		2	0	0	2	1	0				3	1
North Dakota State University				1	0	0				1	0	0		1	0	0
Northeastern University	4	0	0	2	0	0				6	1	0		1	0	0	1	1	0	3	0	0	5	2
Northwestern University	4	0	0	4	1	0	6	4	0	3	2	0		1	1	0	1	1	0	1	0	0	4	3
Oakland University	3	0	0
Ohio Dominican University																							1	0
Ohio State University	3	0	0	2	0	0	5	0	0	4	0	0					1	0	0	2	2	0	3	0
Oregon Health and Science University	1	0	0	1	1	0	3	0	0	2	0	0								1	0	0
Oregon State University	1	1	0				1	0	0	1	0	0								2	1	0
Pennsylvania State University				3	1	0	9	2	0	6	3	0		8	2	1	3	2	0	3	0	0	3	2
Pepperdine University				1	0	0
Princeton University	6	4	0	5	1	0	5	3	1	1	0	0		1	0	0	1	0	0	2	2	0	3	3
Purdue University	3	0	0	3	0	0	10	3	0	3	0	0		4	2	0	8	3	0	3	0	0	3	2
Rensselaer Polytechnic Institute				2	0	0								1	0	0
Research Institute of Fox Chase Cancer Center																							1	0
Rhodes College							1	0	0
Rochester Institute of Technology										1	1	0		2	0	0				1	1	0	2	0
Rockefeller University	1	1	0	1	1	0	1	1	0	1	1	0		1	0	0	1	1	0
Rowan University							2	0	0	1	0	0					3	1	0
Rutgers, University of New Jersey	2	0	0	4	1	0	3	1	0	2	0	0		4	1	0	1	0	0	2	1	0	1	1
Saginaw Valley State University														1	0	0
Salk Institute for Biological Studies	1	1	0	2	1	0	2	2	0	1	0	0					3	1	1	2	0	0
San Diego State University							2	0	0								1	0	0
San Jose State University							2	0	0
Scripps Research Institute	1	0	0				1	1	0	1	0	0		1	0	0	1	1	0	2	1	0	1	1
Scripps Research Institute, Florida										1	1	0		1	1	0
Seattle Children's Research Institute	1	1	0											1	0	0
Seattle University																				1	1	0
Seton Hall University										1	0	0
Southern Illinois University, Carbondale				1	0	0	1	0	0
Southern Methodist University				1	0	0				1	1	0		3	1	0
St. Bonaventure University				1	0	0	0	0	0
St. Jude Children's Research Hospital										2	0	0
St. Louis University				1	0	0
Stanford University	9	4	1	8	5	1	6	3	1	2	1	0		7	3	0	3	0	0	5	4	1	10	5
Stephen F. Austin State University																				1	0	0
Stevens Institute of Technology	1	0	0											1	0	0				1	1	0
Stowers Institute for Medical Research				1	0	0
SUNY Albany				1	0	0
SUNY Binghamton							2	0	0					1	0	0	2	1	0				1	0
SUNY Buffalo				3	2	0	2	0	0								1	0	0				4	1
SUNY College of Environmental Science and Forestry																				1	1	0
SUNY Polytechnic Institute				1	0	0
SUNY Stony Brook																	1	1	0
SUNY Upstate Medical University							1	0	0
Swarthmore College							1	0	0
Syracuse University							1	0	0	3	2	0		2	0	0				1	1	0
Temple University				2	0	0
Tennessee Technological University							1	0	0
Texas A & M University	2	1	0	4	0	0	1	0	0	1	0	0		2	0	0	1	0	0	2	0	0	1	0
Texas Christian University				1	0	0
Texas Tech University	1	0	0							2	1	0		1	0	0							1	0
The Jackson Laboratory														1	0	0
The Scintillon Institute										1	0	0
Thomas Jefferson University				1	0	0	1	0	0	1	0	0
Trinity University	1	0	0							1	0	0
Truman State University	1	0	0
Tufts University	2	0	0	1	0	0	1	0	0					1	1	0	1	0	0				2	2
Tulane University				1	0	0
University of Akron							1	0	0								1	1	0	2	0	0
University of Alabama, Birmingham	1	1	0							1	0	0		1	0	0
University of Alabama, Huntsville				1	0	0	6	1	0	0	0	0
University of Alabama, Tuscaloosa																				1	0	0
University of Arizona	2	1	0	3	1	0	3	0	0	3	0	0		1	0	0	5	0	0	2	0	0
University of Arkansas	1	0	0	1	0	0	4	1	0	1	0	0
University of California, Berkeley	1	1	0	2	2	0	3	2	0	2	2	1		2	1	0	3	1	0	4	3	0	1	0
University of California, Davis	7	3	0	3	0	0	1	1	0	2	1	0		1	0	0	3	2	0	4	3	1	2	1
University of California, Irvine	5	1	0	2	0	0	7	1	0					3	2	0	5	3	0	3	2	0	5	4
University of California, Los Angeles	4	2	1	4	0	0	6	2	1	1	0	0		1	1	0	2	1	0	1	1	0	3	2
University of California, Merced				1	1	0				1	1	1								1	1	0
University of California, Riverside	3	1	0	5	1	0	7	1	0					2	0	0	1	0	0				1	0
University of California, San Diego	5	4	0	7	5	0	4	2	0	5	4	0		3	0	0	4	3	2	3	1	0	5	2
University of California, San Francisco				5	3	1	6	2	0					2	2	1	2	2	0
University of California, Santa Barbara				2	0	0	5	0	0	5	3	0		6	1	0	1	1	0	1	1	0	1	0
University of California, Santa Cruz	4	0	0	2	1	0	1	0	0					1	1	1	3	0	0	2	2	1	2	2
University of Central Florida	2	0	0	3	0	0	2	1	0	1	0	0					1	1	0
University of Chicago	4	1	0	1	0	0	3	1	0	5	3	1		4	3	0	6	3	1	6	3	0	6	1
University of Cincinnati	1	0	0	2	0	0	1	0	0	2	1	0		1	1	0	2	1	0	1	1	0
University of Colorado Anschutz School of Medicine																				1	0	0
University of Colorado, Boulder	4	1	0	2	0	0	2	1	0	3	2	0		2	1	0	4	3	0				4	1
University of Colorado, Colorado Springs														1	1	0
University of Colorado, Denver	2	1	0														1	1	0
University of Connecticut				1	0	0	1	0	0	2	1	0											2	0
University of Dayton							1	0	0
University of Delaware	1	0	0	2	0	0	3	1	0					1	1	0				1	1	1
University of Denver							1	0	0	1	0	0		1	0	0							1	0
University of District of Columbia																							1	0
University of Florida	3	0	0	2	2	0	3	0	0	6	3	0		1	0	0	3	1	0	1	0	0	3	1
University of Georgia				2	0	0	2	0	0								1	0	0
University of Hawaii at Manoa	2	0	0
University of Houston	3	0	0	3	2	0	4	2	0	3	0	0		3	2	1	1	0	0	1	1	0	2	0
University of Idaho	1	0	0	2	0	0				1	0	0
University of Illinois, Chicago	1	1	0	2	1	0	2	1	0	1	0	0		2	0	0	1	1	0	1	0	0
University of Illinois, Urbana-Champaign	3	1	0	6	4	0	10	3	0	6	3	0		6	5	1	5	3	0	4	3	1
University of Iowa				2	1	0	1	0	0	2	0	0		1	0	0
University of Kansas	4	0	0	2	1	0	1	0	0	2	1	0		3	1	0				1	1	0
University of Kentucky	2	0	0	1	0	0	3	0	0	2	1	0		1	0	0	1	1	0	3	0	0
University of Louisiana										1	0	0
University of Louisville				1	0	0											1	1	0
University of Maine				1	0	0	1	0	0
University of Maryland, Baltimore County	1	0	0							2	0	0		1	1	0				1	0	0
University of Maryland, College Park	3	0	0	1	0	0	2	0	0	2	0	0		2	0	0
University of Massachusetts	4	0	0	3	1	0	1	0	0					1	1	0				1	0	0	1	0
University of Massachusetts, Amherst	2	1	0	1	1	0	4	2	0					3	0	0							2	0
University of Massachusetts, Dartmouth				1	0	0
University of Massachusetts, Lowell										1	0	0		1	1	0	1	0	0				1	0
University of Memphis				1	0	0
University of Miami, Florida				3	1	1	1	0	0	2	0	0		2	0	0	1	1	0				3	1
University of Michigan	8	4	0	10	5	0	10	3	0	5	2	1		2	1	0	5	2	0				5	0
University of Minnesota				2	0	0	4	1	0					2	0	0				3	1	0	3	1
University of Mississippi				2	1	0				2	0	0
University of Missouri, Columbia														1	0	0							1	0
University of Missouri, St. Louis	2	0	0														1	0	0
University of Montana	1	0	0	1	0	0
University of Nebraska, Lincoln	1	0	0	1	0	0	4	0	0	2	0	0								1	1	0
University of Nevada, Las Vegas																				1	1	0	1	1
University of Nevada, Reno																	2	0	0
University of New Hampshire				1	0	0
University of New Mexico	1	1	1	1	0	0	3	1	0											1	0	0	1	0
University of New Orleans														1	0	0
University of North Carolina, Chapel Hill	4	1	0	6	0	0	5	2	2	5	3	1		7	4	1	3	1	0	5	3	0	3	1
University of North Carolina, Charlotte							1	1	0
University of North Carolina, Greensboro																	1	1	0	2	0	0
University of North Texas				1	0	0
University of Notre Dame	1	0	0	3	2	0	1	1	0	1	1	0		4	2	0	1	0	0	3	1	0	2	1
University of Oklahoma	1	1	0							1	0	0
University of Oregon										6	1	0
University of Pennsylvania				1	1	0	7	4	1	3	1	0					2	1	0	3	1	1	2	0
University of Pittsburgh	4	1	0	6	0	0	2	1	0	1	1	1		4	1	0	9	2	0	5	1	0	1	1
University of Puerto Rico							1	0	0
University of Rhode Island				1	0	0	2	0	0					1	0	0	1	0	0	1	1	0
University of Rochester	5	1	0	2	1	0	2	1	0	2	0	0		3	2	0	1	0	0	3	1	0	3	1
University of South Alabama	1	0	0							1	0	0					1	1	0
University of South Carolina				1	0	0
University of South Florida				1	0	0	1	0	0								2	1	0				1	1
University of Southern California	7	4	0	4	2	0	1	0	0	3	0	0		4	1	0	4	0	0	2	1	0	4	3
University of Southern Mississippi				1	0	0														1	1	0
University of Tennessee, Knoxville	1	0	0							4	1	0		1	0	0	1	0	0
University of Texas Medical Branch				1	0	0	1	0	0
University of Texas Southwestern Medical Center	3	0	0	4	1	0	4	2	0	2	1	0		3	1	0	2	0	0	2	2	0	2	0
University of Texas, Arlington							2	0	0	1	0	0
University of Texas, Austin	1	0	0	7	2	0	5	2	0	5	0	0		6	1	0	5	2	0	5	4	0	2	1
University of Texas, Dallas	1	0	0	2	1	0	1	0	0					1	0	0	1	1	0				1	0
University of Texas, El Paso														1	1	0
University of Texas, Houston										1	1	0
University of Texas, San Antonio				4	0	0
University of Toledo				1	0	0
University of Tulsa	1	1	0	1	0	0											1	0	0
University of Utah	2	1	0	4	1	0	5	0	0	1	0	0		3	0	0	3	1	0	1	0	0	1	1
University of Vermont				2	1	0	1	0	0
University of Virginia	5	1	0	5	0	0	5	1	0	3	1	0		2	1	1	1	0	0				6	1
University of Washington	9	7	1	4	3	1	3	0	0	3	1	0		7	4	0	5	3	1				7	5
University of Wisconsin, Madison	3	1	0	2	1	0	1	1	0	4	0	0		5	3	0	5	3	1	4	3	1	7	4
University of Wisconsin, Milwaukee	1	0	0
Utah State University				2	0	0
Valparaiso University							1	0	0
Vanderbilt University	5	2	0	4	1	0	1	0	0	2	0	0		3	2	0	6	3	0	3	1	0	4	2
Villanova University																	1	1	0	1	1	0
Virginia Commonwealth University				1	0	0				1	0	0
Virginia Polytechnic Institute				1	1	0	2	1	0	2	1	0		5	3	0	1	0	0	1	0	0	4	2
Wake Forest University				2	1	0
Washington State University	1	1	0				0	0	0	0	0	0					2	1	0				1	0
Washington University, St. Louis	9	4	0	4	2	0	13	1	0	8	4	0		2	1	0	4	2	0	2	0	0	8	3
Wayne State University				2	0	0				3	1	0					1	1	0				2	1
Wesleyan University				1	0	0
West Virginia University							1	0	0	1	0	0
Western Michigan University										1	0	0
Westminster College	1	0	0
William Marsh Rice University	2	1	0				1	1	0	1	1	0		3	2	0	1	1	0	1	1	0	2	1
Wistar Institute	1	0	0
Worcester Polytechnic Institute							1	1	0	1	0	0											2	1
Wright State University							2	0	0
Xavier University of Louisiana							2	0	0
Yale University	14	5	0	6	2	0	8	4	0	5	3	1		5	0	0	3	2	0	4	3	0	9	6
Yeshiva University	1	0	0
	316	99	8	351	100	10	405	108	10	293	98	10		256	96	11	230	105	10	194	94	11	246	97	0
